# Supplementary material for: Experimental investigation and thermodynamic modelling assessment of the AECl2–NdCl3 (AE = Sr, Ba) systems
Source: Royal Society of Chemistry journal article supplement (doi:10.1039/d4cp01784f), 2024-01-01
Supplement: d4cp01784f1.pdf [file d4cp01784f1.pdf]

1 Supporting Information to 'Experimental investigation  
2 and thermodynamic modelling assessment of the  
3  $\text{AECl}_2\text{-NdCl}_3$  (AE = Sr, Ba) systems'

4 D.C. Alders<sup>a</sup>, D.J. Cetto<sup>a</sup>, R.J.M. Konings<sup>a</sup>, A.L. Smith<sup>a,\*</sup>

5 <sup>a</sup>*Delft University of Technology, Faculty of Applied Sciences, Radiation Science &*  
6 *Technology Department, Mekelweg 15, 2629 JB Delft, The Netherlands*

---

---

7 **1. Quenched samples profile refinements**

8 In this section, the refinements of the solid solution XRD measurements are  
9 presented.

---

\*Corresponding author

*Email address:* [a.l.smith@tudelft.nl](mailto:a.l.smith@tudelft.nl) (A.L. Smith)

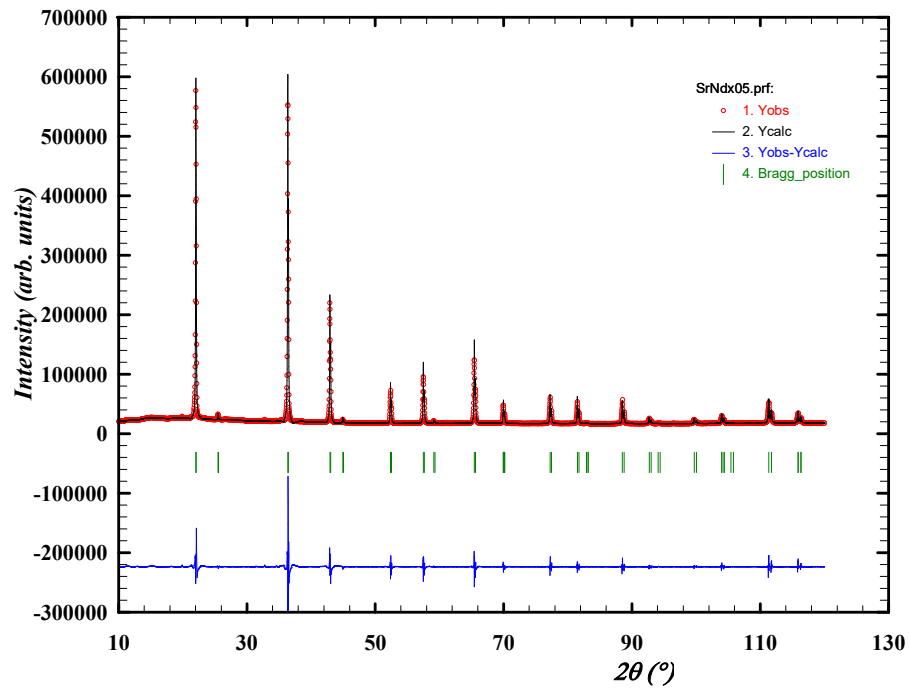

Figure 1: Profile refinement of the Sr-Nd-Cl system at  $x_{\text{NdCl}_3} = 0.05$  after quenching the sample from  $T = 925$  K. The observed intensity (Yobs, red) is plotted along with the calculated intensity from the refinement (Ycalc, black), and the difference between the two is shown (Yobs-Ycalc, blue). The angles at which reflections occur are shown as well (Bragg positions, vertical lines). Measurement at  $\lambda = \text{Cu-K}\alpha$ .

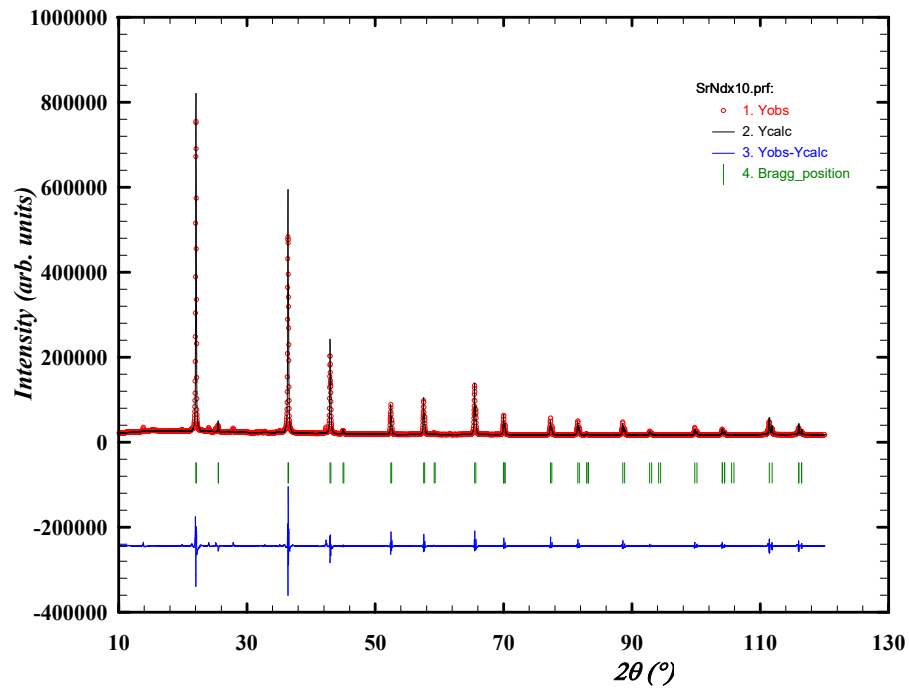

Figure 2: Profile refinement of the Sr-Nd-Cl system at  $x_{\text{NdCl}_3} = 0.10$  after quenching the sample from  $T = 925$  K. The observed intensity (Yobs, red) is plotted along with the calculated intensity from the refinement (Ycalc, black), and the difference between the two is shown (Yobs-Ycalc, blue). The angles at which reflections occur are shown as well (Bragg positions, vertical lines). Measurement at  $\lambda = \text{Cu-K}\alpha$ .

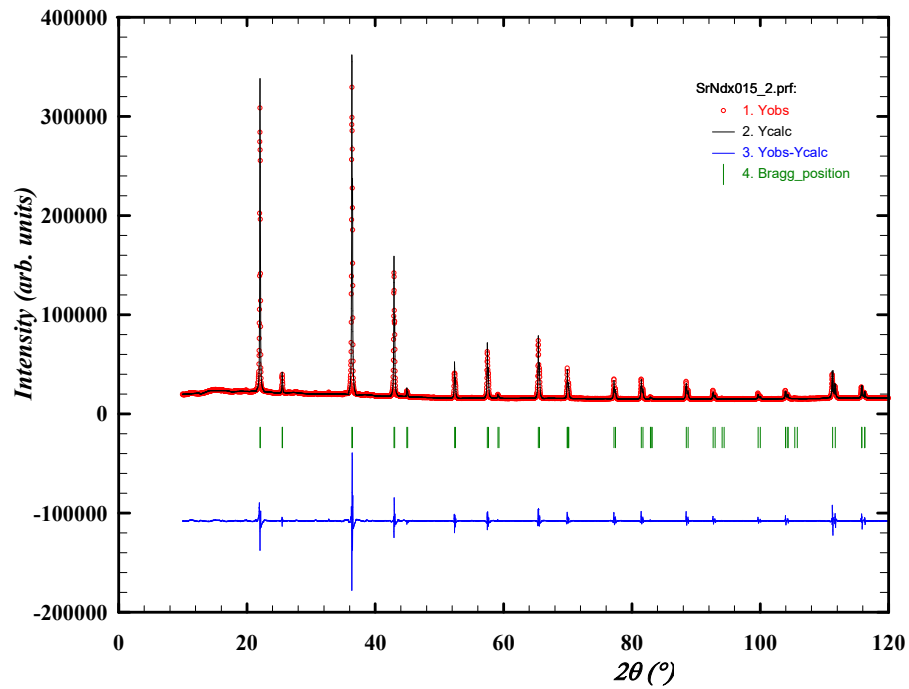

Figure 3: Profile refinement of the Sr-Nd-Cl system at  $x_{\text{NdCl}_3} = 0.15$  after quenching the sample from  $T = 900$  K. The observed intensity (Yobs, red) is plotted along with the calculated intensity from the refinement (Ycalc, black), and the difference between the two is shown (Yobs-Ycalc, blue). The angles at which reflections occur are shown as well (Bragg positions, vertical lines). Measurement at  $\lambda = \text{Cu-K}\alpha$ .

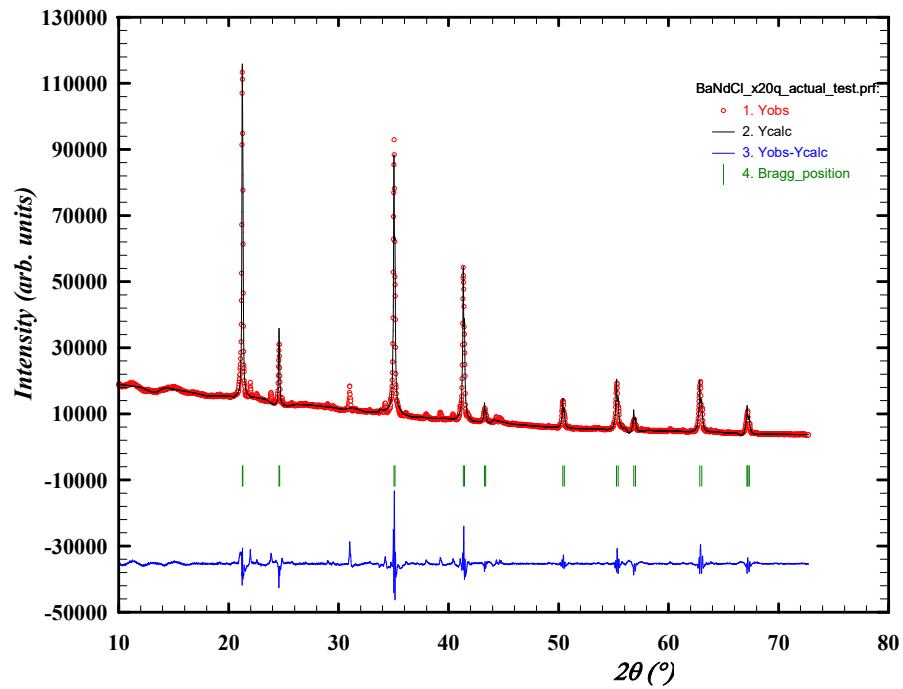

Figure 4: Profile refinement of the Ba-Nd-Cl system at  $x_{\text{NdCl}_3} = 0.2$  after quenching the sample from  $T = 975$  K. The observed intensity (Yobs, red) is plotted along with the calculated intensity from the refinement (Ycalc, black), and the difference between the two is shown (Yobs-Ycalc, blue). The angles at which reflections occur are shown as well (Bragg positions, vertical lines). Measurement at  $\lambda = \text{Cu-K}\alpha$ .

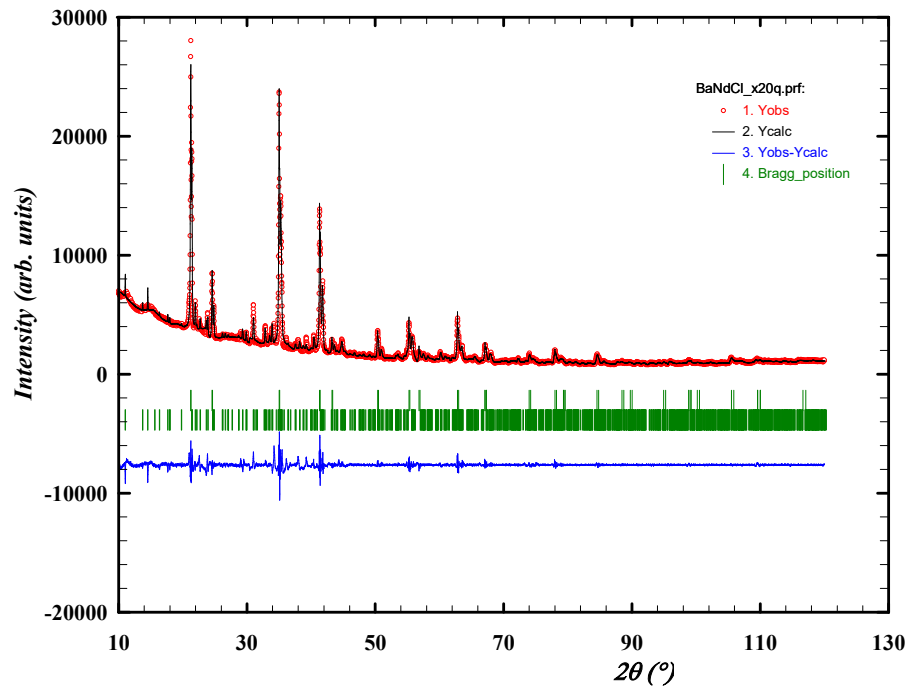

Figure 5: Profile refinement of the Ba-Nd-Cl system at  $x_{\text{NdCl}_3} = 0.25$  after quenching the sample from  $T = 975$  K. The observed intensity (Yobs, red) is plotted along with the calculated intensity from the refinement (Ycalc, black), and the difference between the two is shown (Yobs-Ycalc, blue). The angles at which reflections occur are shown as well (Bragg positions, vertical lines). Measurement at  $\lambda = \text{Cu-K}\alpha$ .
